# Supplementary material
Source: publisher figshare collection journal article supplement (https://geolsoc.figshare.com/ndownloader/files/14229521)
Supplement: Supplementary file 1 [file 14229521]

## Sheet: Table S1
Table S1. Description of samples used for zircon analysis
	GPS coordinates (Deg° Min' Sec")				Zircon description
Sample number	Latitude (S)	Longitude (E)	Southern Irumide Belt terrane	Description	Colour	Aspect ratios	General long axis length of grains	CL characteristics
Z16-26	14 59 09	29 59 11	Chewore-Rufunsa	Felsic gneiss - Quartz (30%), Biotite (20%), Muscovite (5%), Plagioclase (10%), Garnet (5%), K-feldspar (30%)	Clear to brown	1:1 to 1:3	40 to 100 μm	Generally dark in CL. Oscillatory zonation oberserved in all analysed grains. Inclusions observed in the core of a single (Z16-26-04) grain.
Z16-27	14 59 09	29 59 11	Chewore-Rufunsa	Intermediate intrusive - loosely aligned Biotite (10%) and Muscovite (minor), Plagioclase (70%), Quartz (15%), K-feldspar (5%), Amphibole (Minor)	yellow to brown	1:1 to 1:5	60 to 200 μm	Oscillatory zonation observed in most grains. Variable CL brightness observed in the cores and rims, though many grains display brighter cores than rims.
Z16-50	14 14 08	31 41 48	Nyimba-Sinda	Granite - Quartz (40%), K-Feldspar (40%), Plagioclase (20%), Opaque (minor)	Clear	1:1 to 1:3	50 to 200 μm	Oscillatory zoned grains. In many cases zonation patterns in the rims are disturbed, with similar disturbances observed in a number of cores. Some grains display apparent separate, more simple (few alternating zones) rims.
Z16-40	13 42 25	32 29 21	Chipata	Felsic gneiss - Quartz (30%), Plagioclase (15%), K-feldspar (40%), Garnet (5%), Chlorite (5%), Biotite (5%), Opaque (Minor)	Mostly clear - some very light brown	1:1 to 1:5	50 to 200 μm	Predominantly oscillatory zoned grains, inclusions present in many grains. A number of zircon cores are relatively dark in CL, while displaying bright rims.
Z16-41	13 40 23	32 32 57	Chipata	Charnockite - Clinopyroxene (15%), Orthopyroxene (5%), Quartz (20%), Plagioclase (40%), Perthite (20%)	Clear to yellow-brown	1:2 to 1:5	60 to 300 μm	Faint oscillatory zonation preserved in some grains, in many cases the zonation is poorly preserved, with zircon cores surrounded by minimal zonation. A smaller number of grains preserve almost no zonation.
Z16-42	13 40 23	32 32 57	Chipata	Charnockite - Clinopyroxene (20%), Orthopyroxene (5%), Quartz (15%), Plagioclase (30%), Perthite (30%), Garnet, Opaque	yellow to brown - some clear	1:2 to 1:5	60 to 300 μm	Faint oscillatory zonation preserved in some grains, in many cases the zonation is poorly preserved, with zircon cores surrounded by minimal zonation. A smaller number of grains preserve almost no zonation.
Z16-35	13 59 38	32 08 04	Chipata	Quartzite - Small inclusions of biotite and muscovite within quartz grains	Mostly clear - some brown	1:1 to 1:4	50 to 200 μm	Most grains display rounding, with many also being fragmented. Oscillatory zoning is observed in most grains.
